# Supplementary material for: The initial expression alterations occurring to transcription factors during the formation of breast cancer: Evidence from bioinformatics
Source: PubMed Central journal article supplement (PMC8894706; doi:10.1002/cam4.4545), 2022-01-17
Supplement: CAM4-11-1371-s001.pdf [file CAM4-11-1371-s001.pdf]

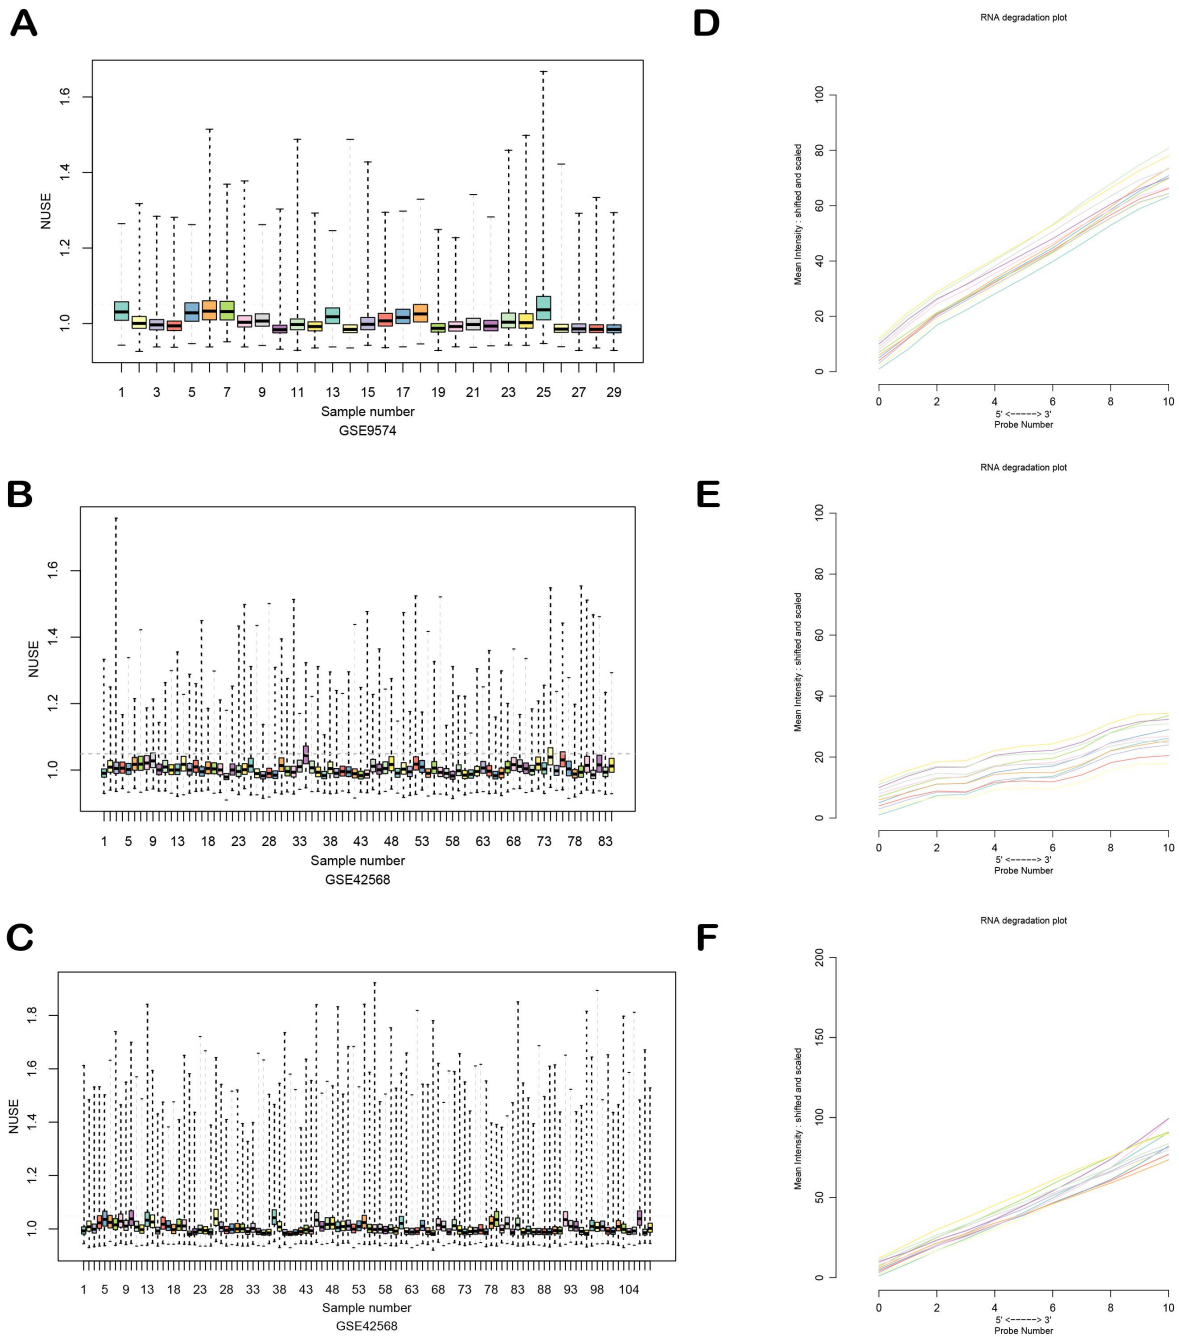

**Figure S1.** Raw data quality control at probe level. (A-C) Normalized unscaled standard error (NUSE) boxplots for GSE9574, GSE15852 and GSE42568, each box of which represents a gene chip or sample. The gray dotted line corresponds to the alarming value of 1.05. (D-F) RNA degradation plots of GSE9574, GSE15852 and GSE42568, each line in which represents the degradation of a sample.

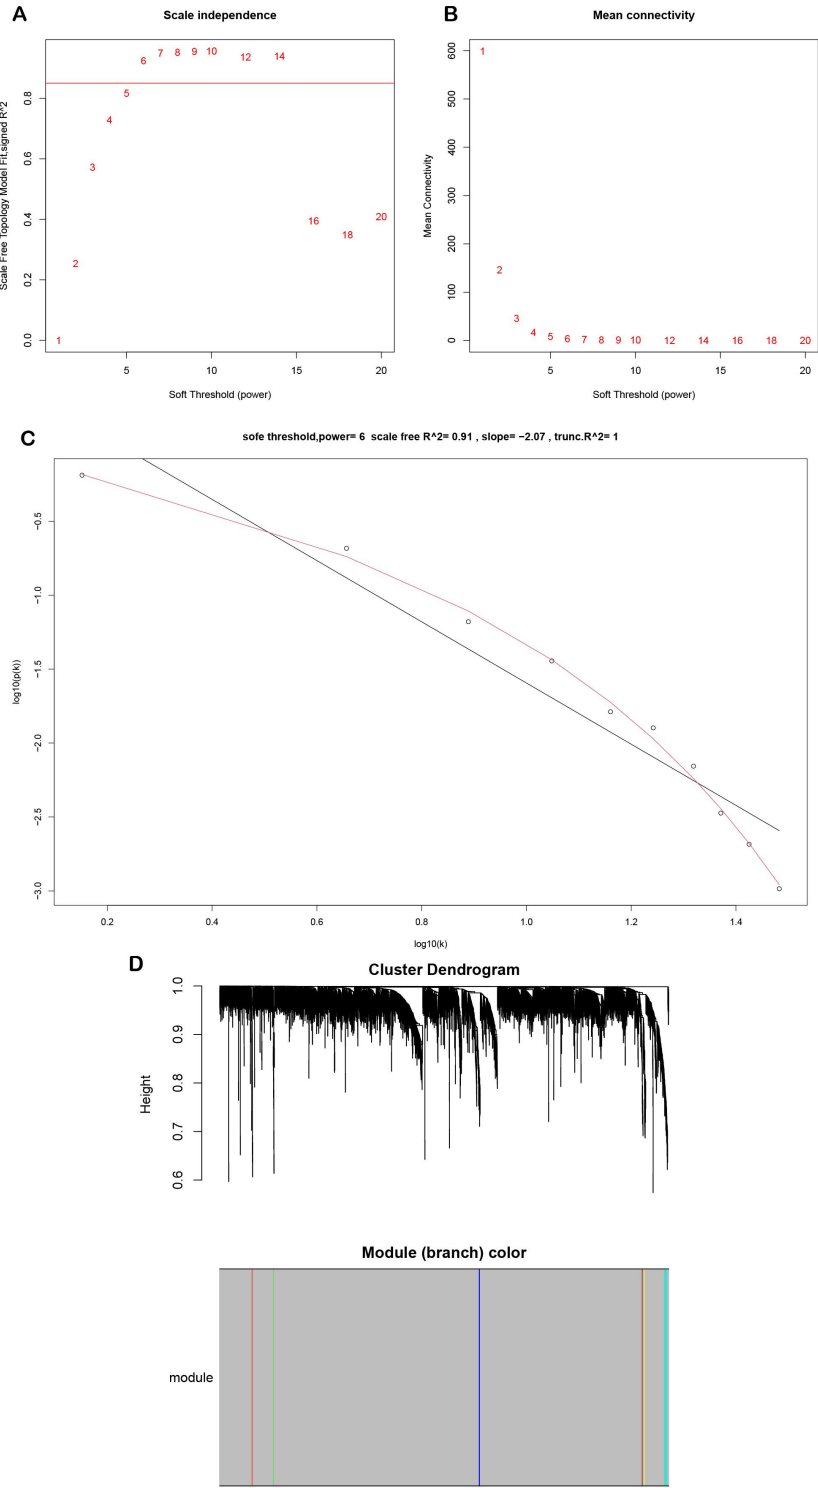

**Figure S2.** WGCNA performed on 94 BC samples in GSE42568. **(A)** The corresponding signed  $R^2$  (scale-free topology fit) of different soft thresholds (powers). The red line represents signed  $R^2 = 0.85$  and a network with signed  $R^2 > 0.8$  could be considered to meet scale-free topology. **(B)** The mean connectivity under different soft thresholds. **(C)** Scale-free topology plot of the network that was built with the soft threshold = 6. The scale-free  $R^2 = 0.91$  indicated that the network satisfied scale-free topology. **(D)** Clustering dendrogram and six detected modules in the network. Different colors represent different modules.

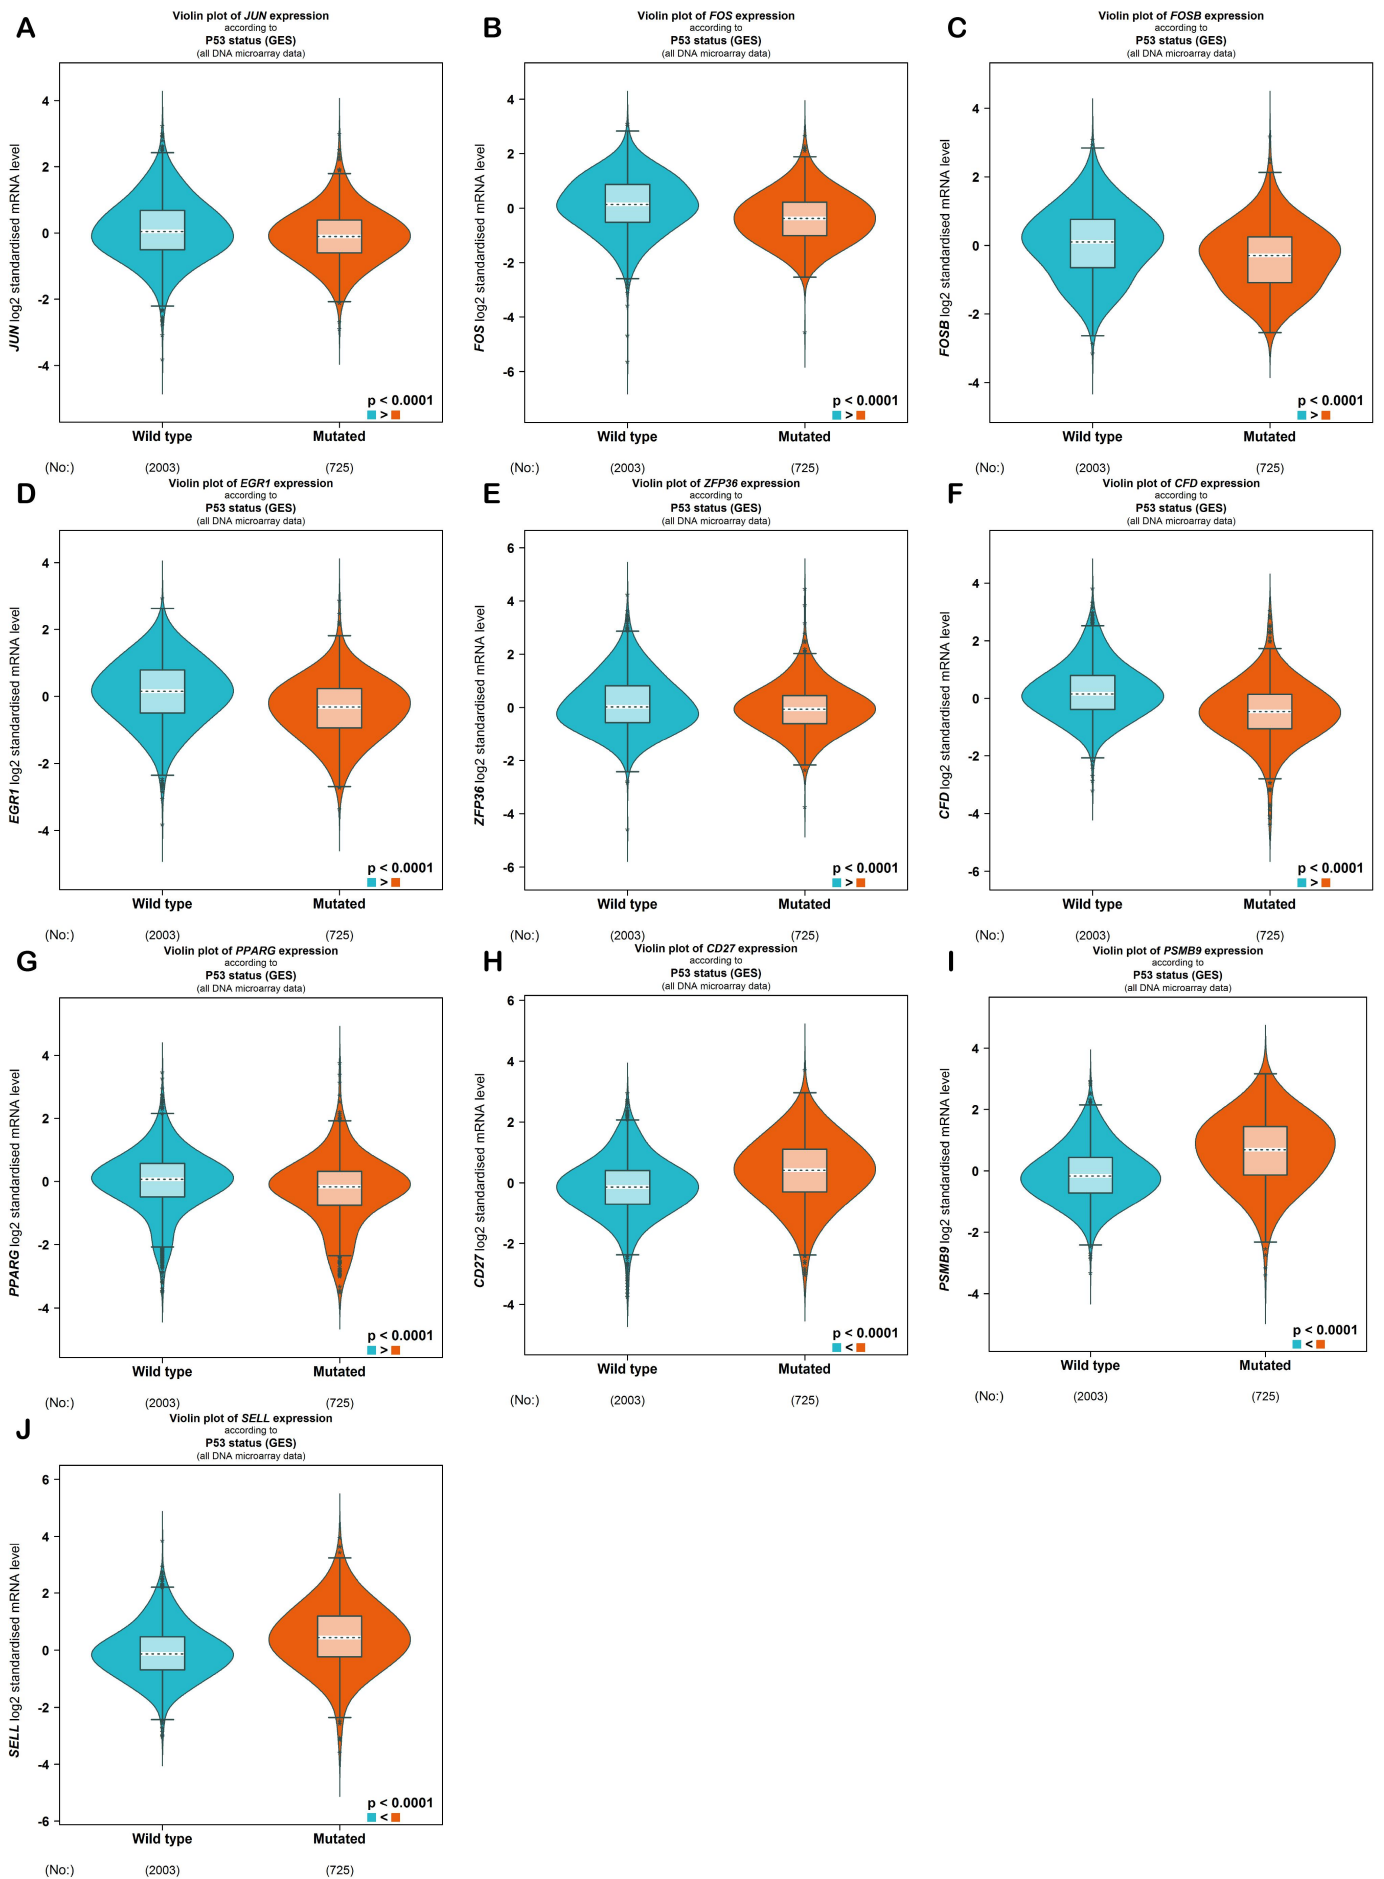

**Figure S3.** Expression levels of candidate genes based on TP53 mutation status in BC. Violin plots with p value < 0.05 are presented.

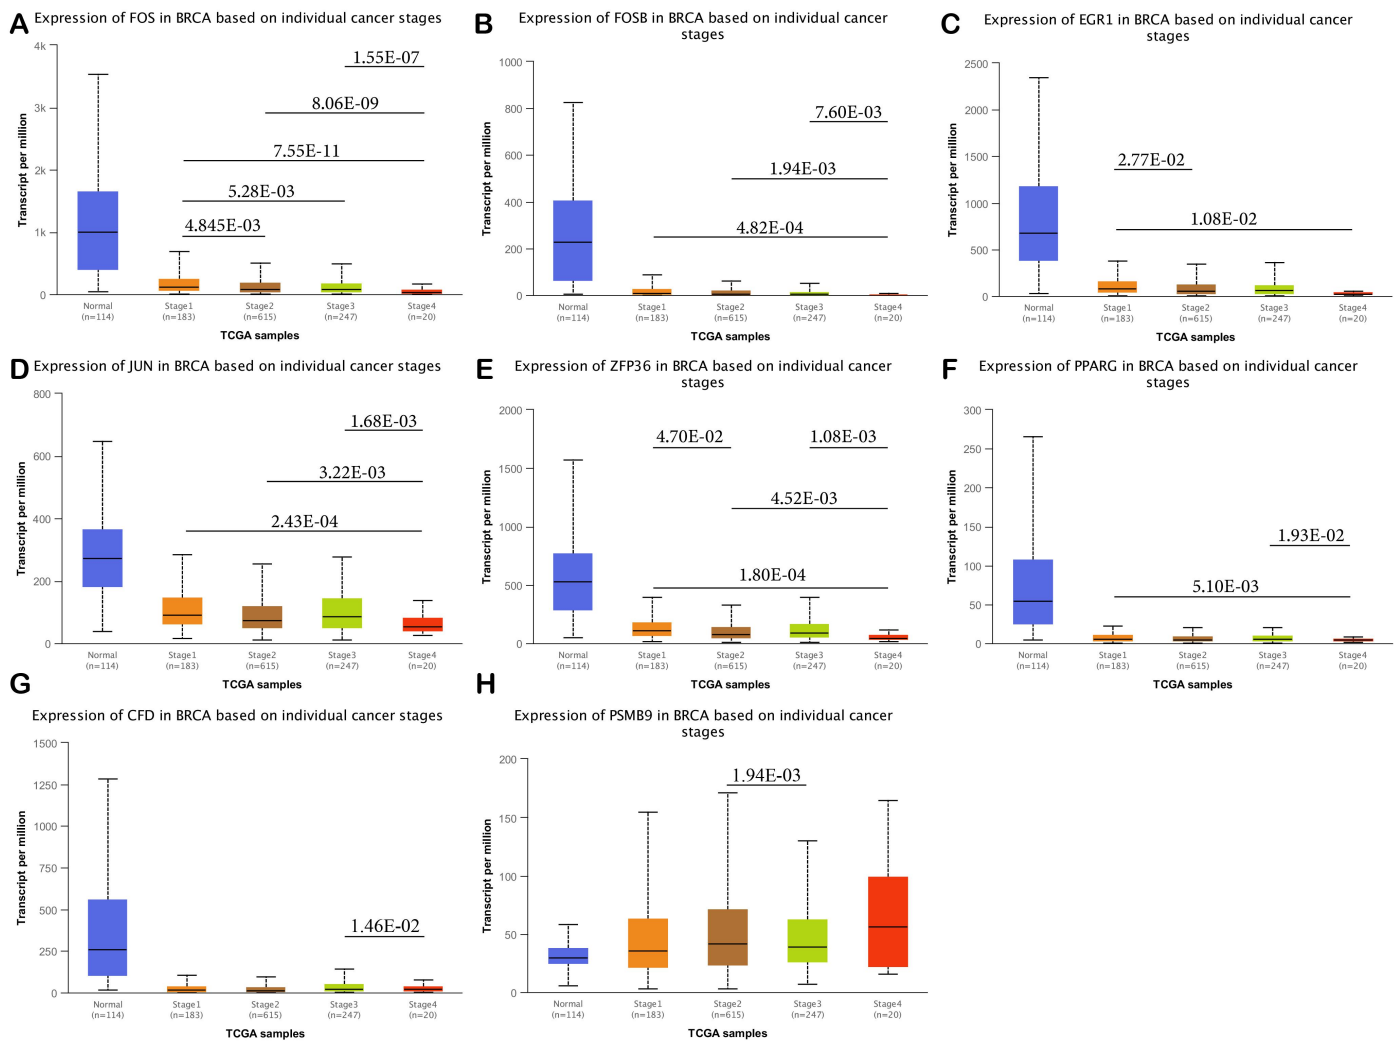

**Figure S4.** Expression levels of candidate genes based on individual cancer stage of BC patients. Boxplots with  $p$  value  $< 0.05$  between at least two stages are presented, as well as the corresponding  $p$  value.

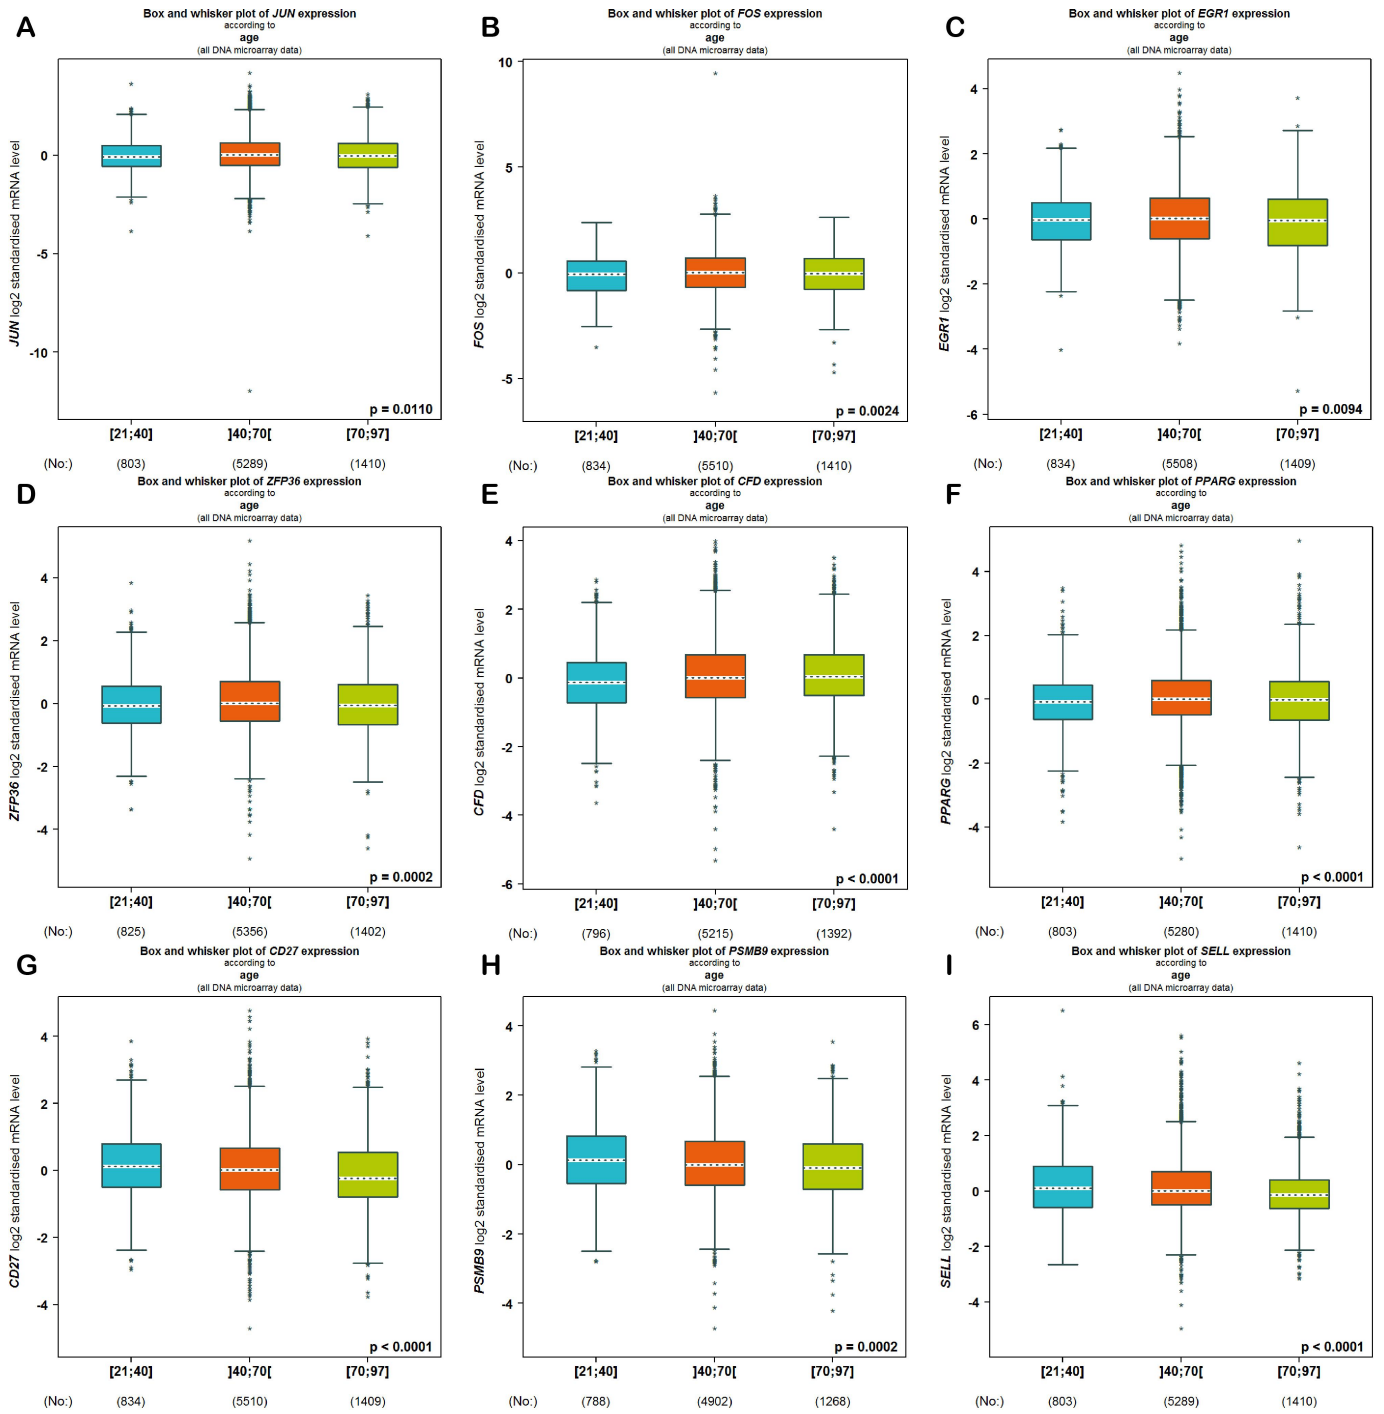

**Figure S5.** Expression levels of candidate genes based on BC patients' age. Boxplots with p value < 0.05 are presented, as well as the corresponding p value.

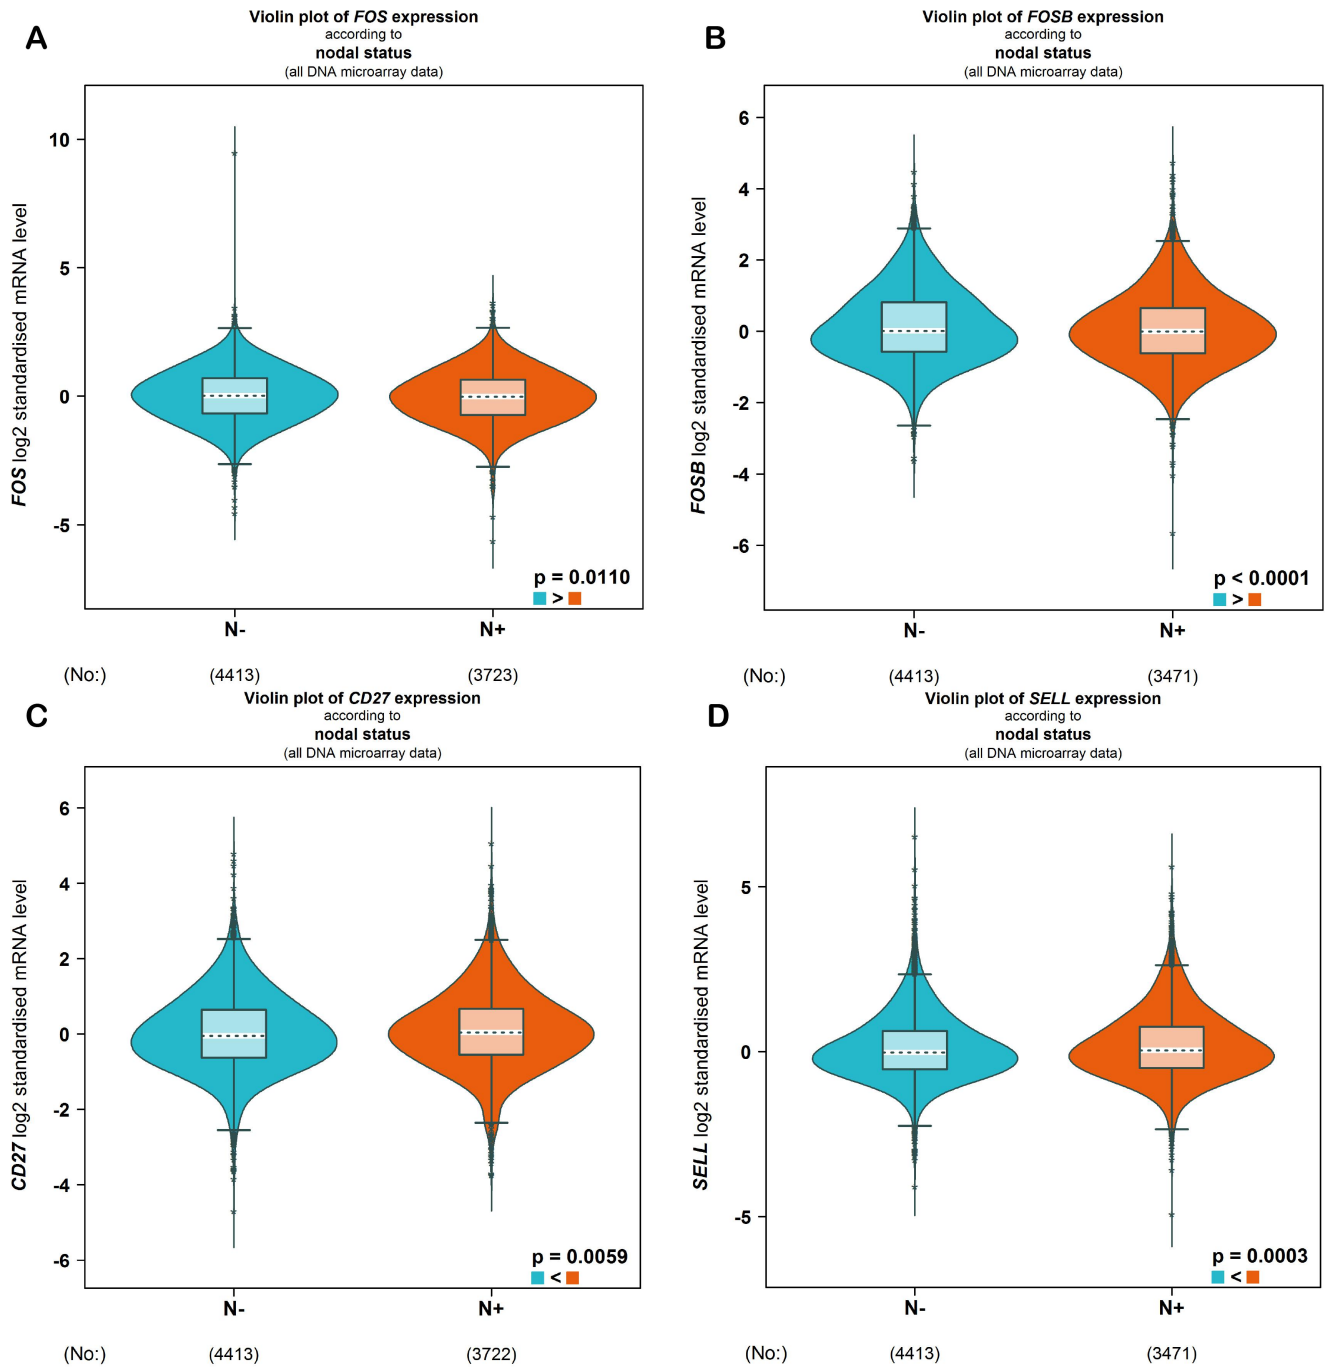

**Figure S6.** Expression levels of candidate genes based on nodal status of BC patients. Violin plots with p value < 0.05 are presented, as well as the corresponding p value.

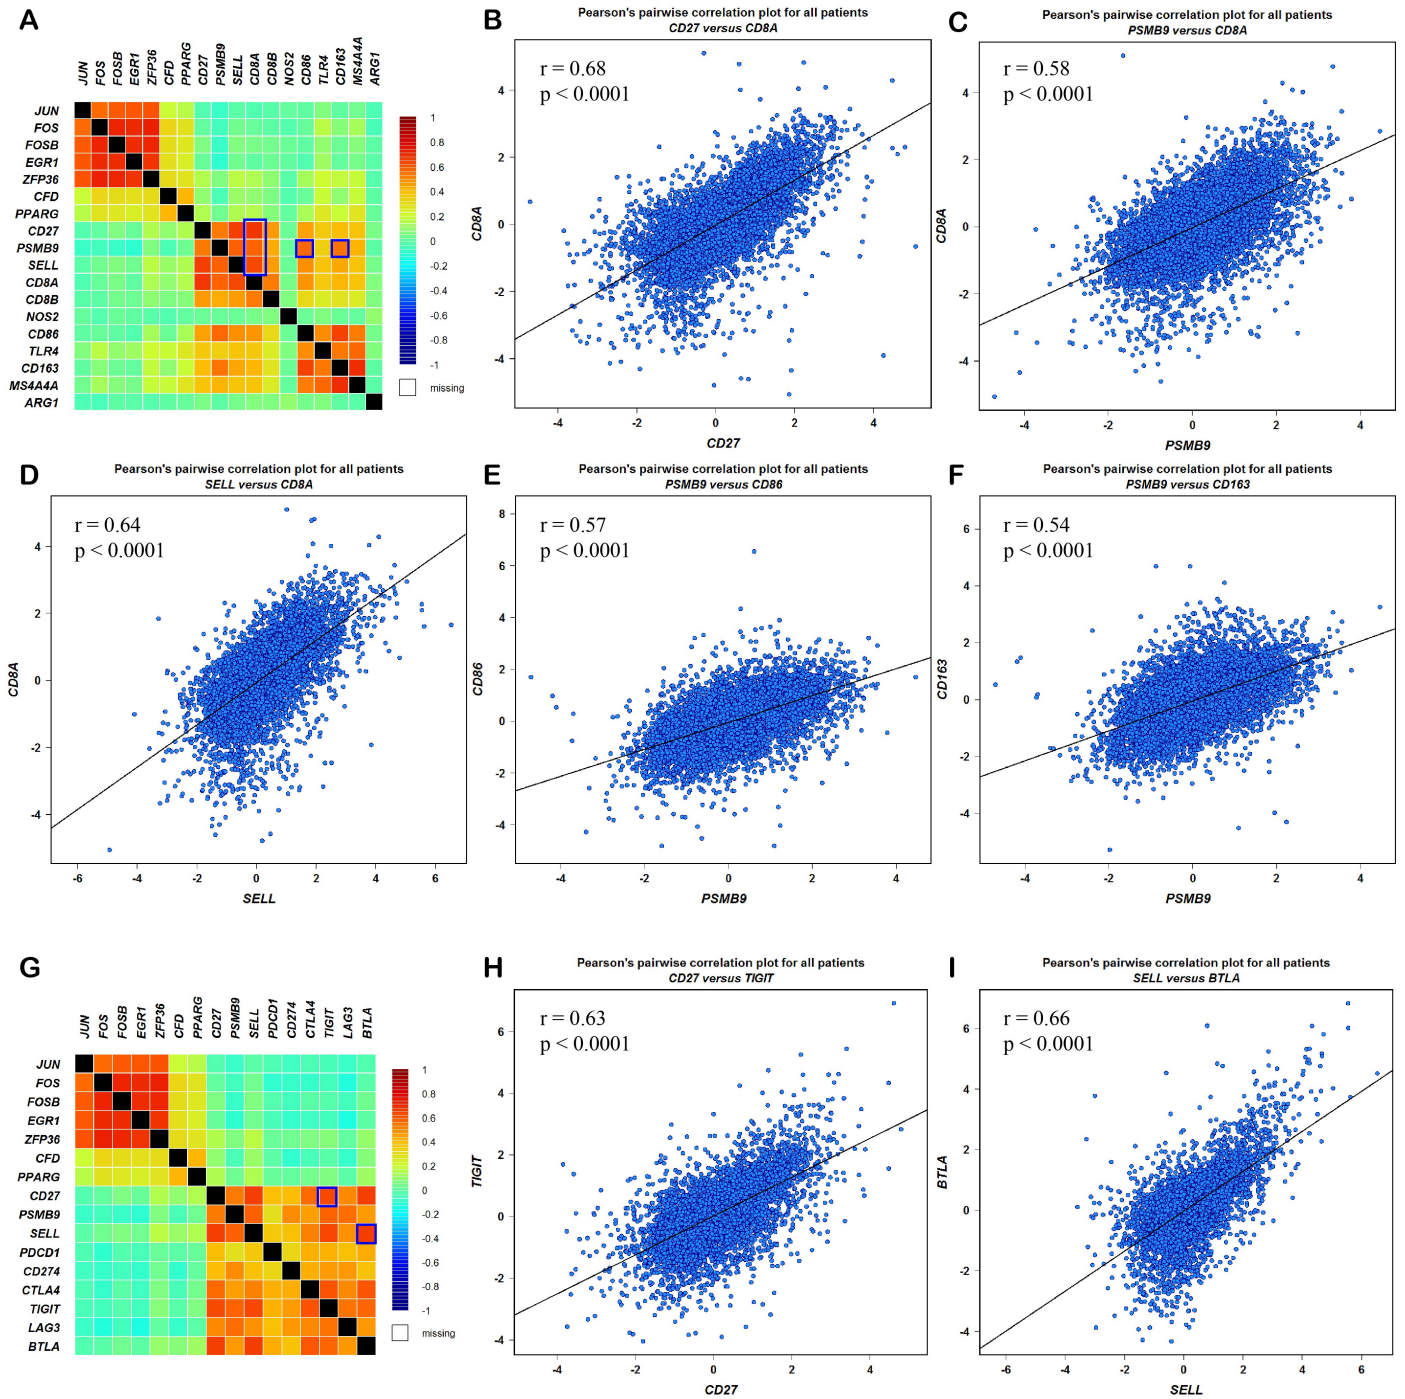

**Figure S7.** Expression correlations of candidate genes with biomarkers of immune cells and immune checkpoints. (A-F) Expression correlations of candidate genes with biomarkers of immune cells (CD8<sup>+</sup> T cell, M1 macrophage and M2 macrophage). (G-I) Expression correlations of candidate genes with immune checkpoints.

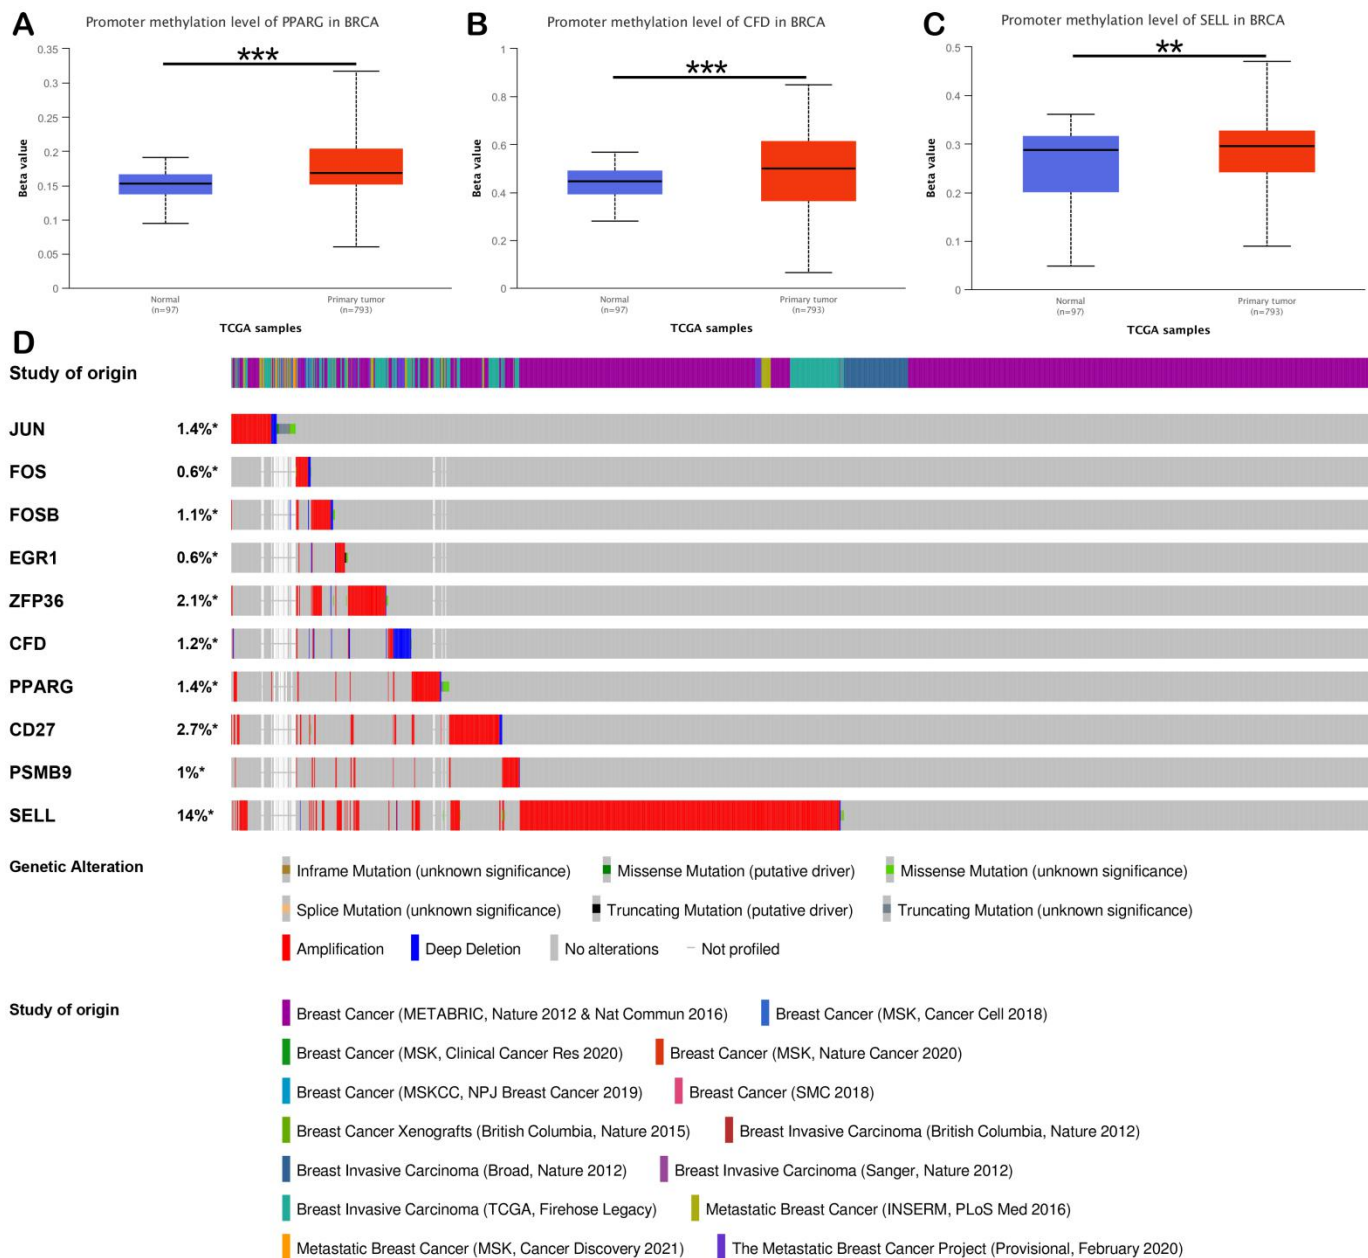

**Figure S8.** Promoter methylation and genetic alteration analysis for candidate genes. (A-C) Promoter methylation status of PPARG, CFD and SELL.  $**p < 0.01$ ,  $***p < 0.001$ . (D) genetic alterations of candidate genes.



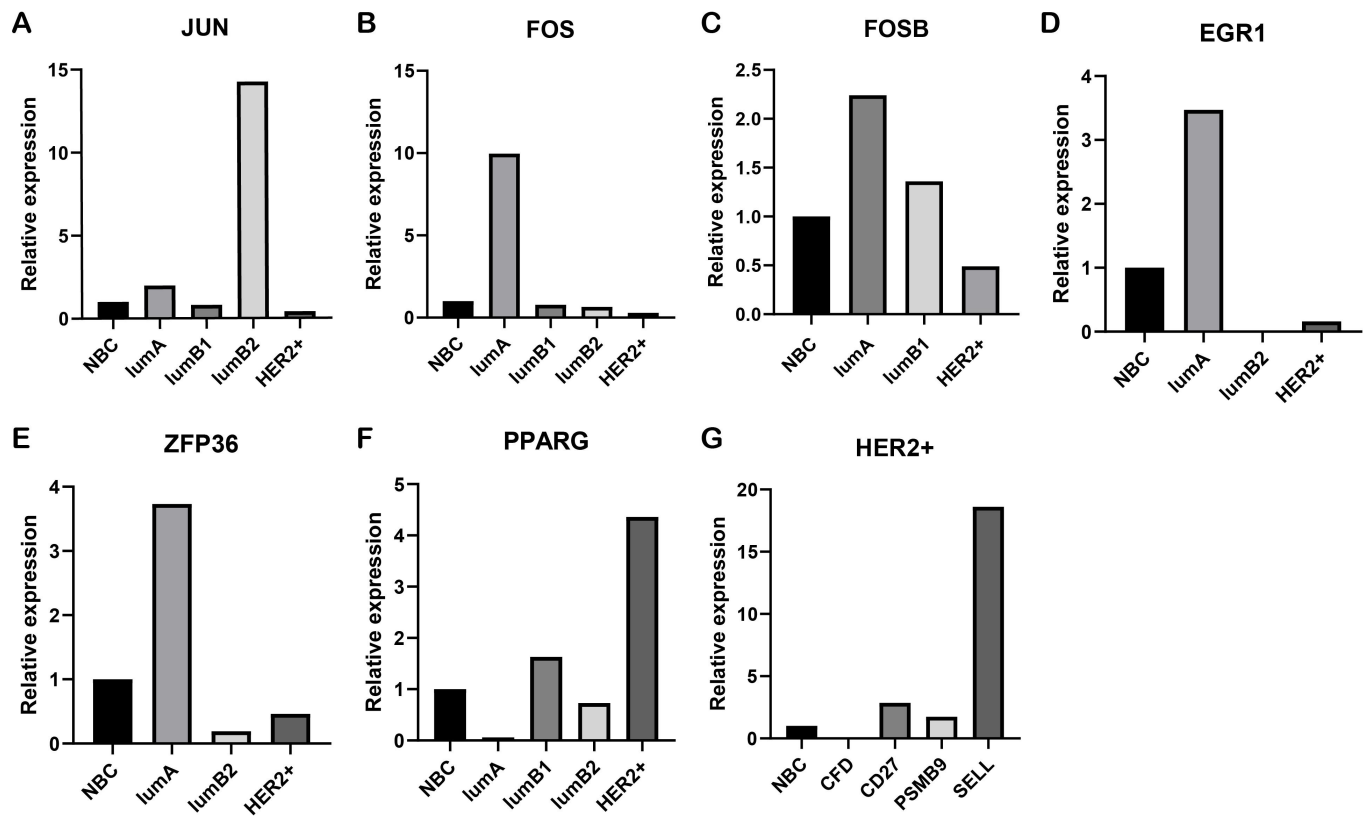

**Figure S9.** Relative expression of candidate genes in BC compared to pair normal breast tissues.

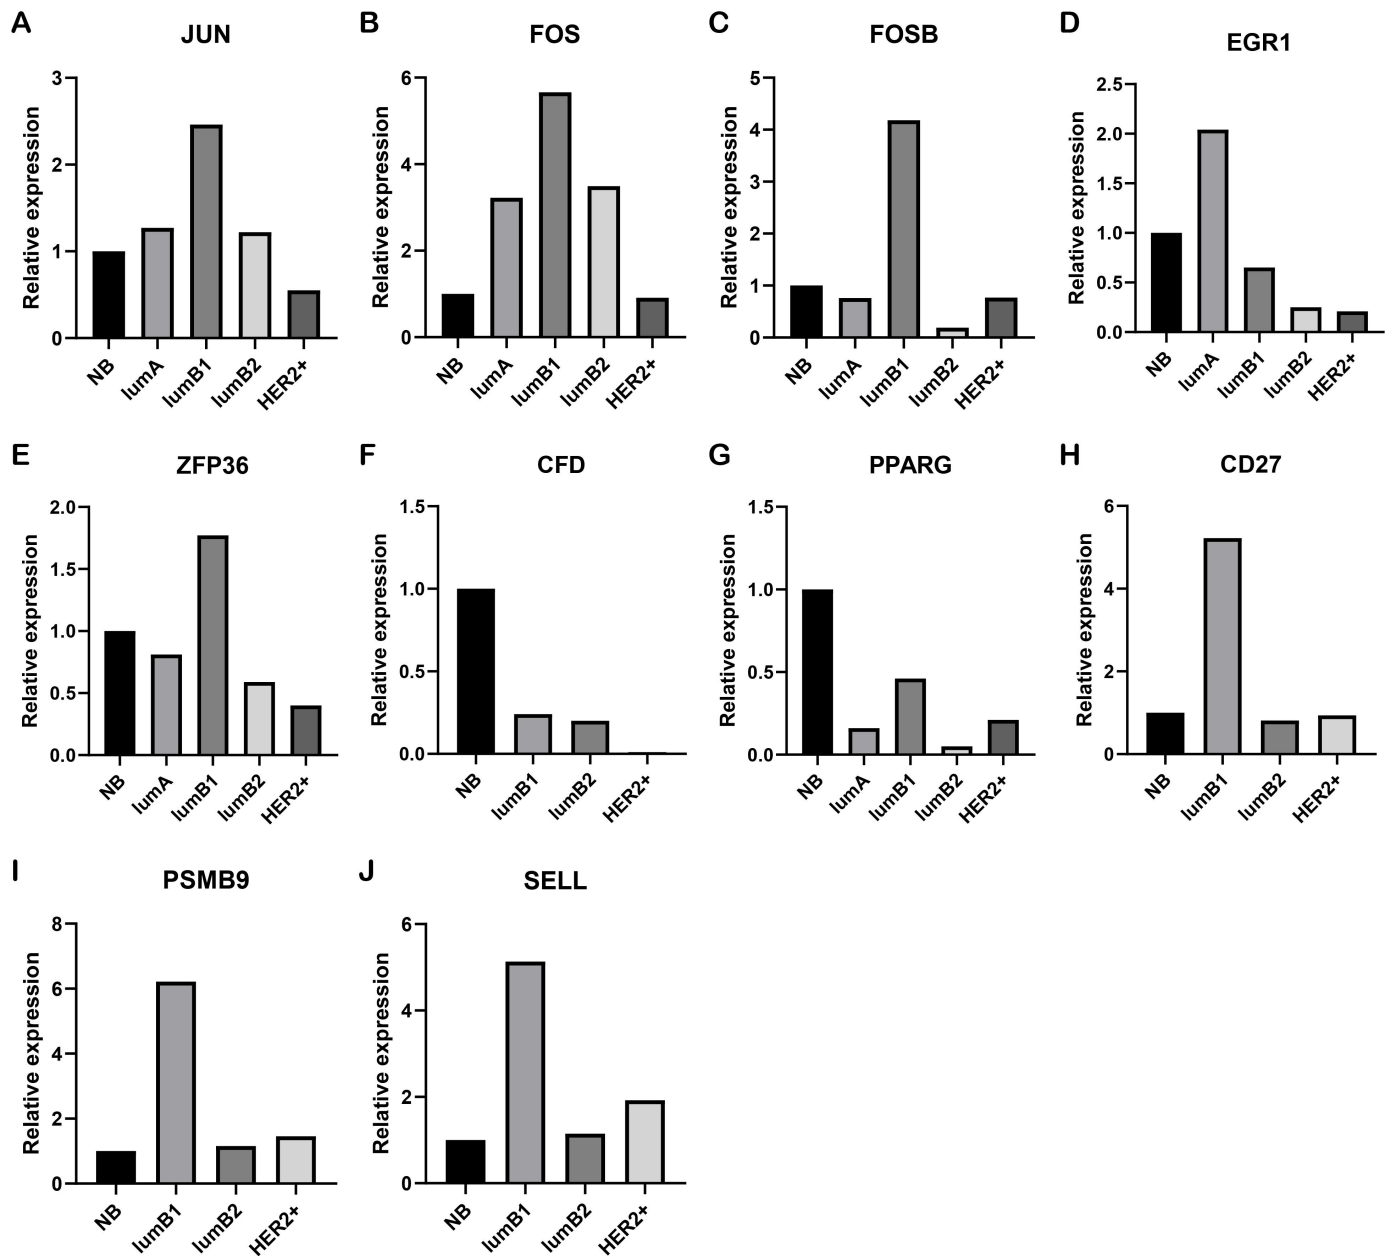

**Figure S10.** Relative expression of candidate genes in BC tissues obtained from 4 BC patients and non-BC tissues obtained from patients with benign breast disease.

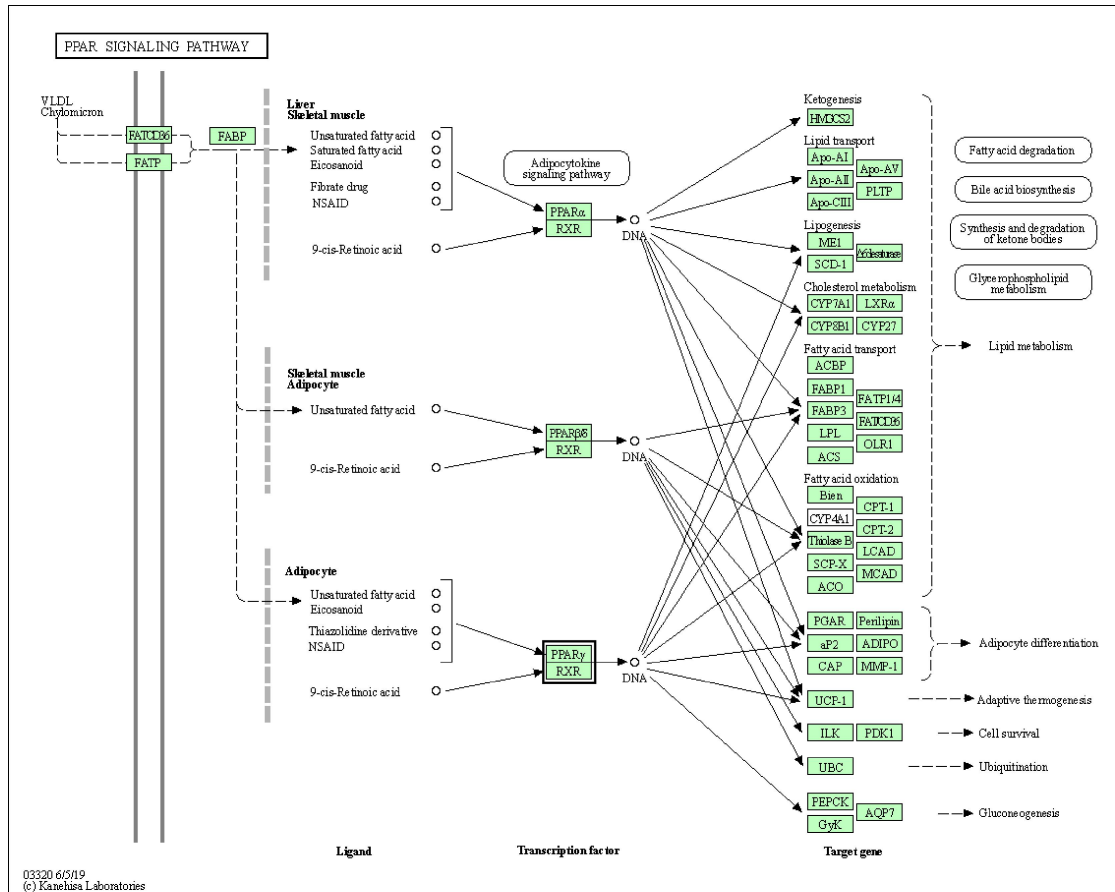

**Figure S11.** PPAR signaling pathway significantly enriched by DEGs of module 1 in GSE15852 dataset. PPAR gamma (i.e., PPARG) is stood out around by black box.

**Table S1.** Primer sequences of candidate genes used for RT-PCR in the present study

| Candidate gene | Primer Sequence                                                          |
|----------------|--------------------------------------------------------------------------|
| <i>JUN</i>     | Forward 5'-GCCAACTCATGCTAACGCAG-3'<br>Reverse 5'-CTCTCCGTCGCAACTTGTCA-3' |
| <i>FOS</i>     | Forward 5'-GGGAGGACCTTATCTGTGCG-3'<br>Reverse 5'-ACACACTCCATGCGTTTTGC-3' |
| <i>FOSB</i>    | Forward 5'-AGCAGCAGCTAAATGCAGGA-3'<br>Reverse 5'-CCACCAGCACAAACTCCAGA-3' |
| <i>EGR1</i>    | Forward 5'-CCCCGACTACCTGTTTCCAC-3'<br>Reverse 5'-GACAGAGGGGTTAGCGAAGG-3' |
| <i>ZFP36</i>   | Forward 5'-CACTCCTATCAGCGTCTGGG-3'<br>Reverse 5'-TCGAAGACGGGAGAGTCTG-3'  |
| <i>CFD</i>     | Forward 5'-TCAGCCACAGCGGCTTC-3'<br>Reverse 5'-GATCCGACCACGGGGC-3'        |
| <i>PPARG</i>   | Forward 5'-CCAGAAGCCTGCATTTCTGC-3'<br>Reverse 5'-TGGCATCTCTGTGTCAACCA-3' |
| <i>CD27</i>    | Forward 5'-ATCAGCAACTGGGCACAGAA-3'<br>Reverse 5'-TGAGCCCAGTAGTGCCTCTC-3' |
| <i>PSMB9</i>   | Forward 5'-CGCTTCACCACAGACGCTAT-3'<br>Reverse 5'-TGCCCAAGATGACTCGATGG-3' |
| <i>SELL</i>    | Forward 5'-AGCACAGCACACTCCCTTTG-3'<br>Reverse 5'-TCATGGCTTTGCTTGGTCCT-3' |

**Table S2.** Enrichment analysis of module genes detected from GSE9574 using Metascape web

| GO         | Category                | Description                        | Count | %     | Log10(P) |
|------------|-------------------------|------------------------------------|-------|-------|----------|
| M167       | Canonical Pathways      | PID AP1 PATHWAY                    | 5     | 62.50 | -11.34   |
| ko05166    | KEGG Pathway            | HTLV - I infection                 | 5     | 62.50 | -8.48    |
| GO:0009991 | GO Biological Processes | response to extracellular stimulus | 5     | 62.50 | -6.97    |

**Table S3.** Enrichment analysis of module genes detected from GSE15852 using Metascape web

| GO         | Category                | Description                                                                  | Count | %     | Log10(P) |
|------------|-------------------------|------------------------------------------------------------------------------|-------|-------|----------|
| WP236      | WikiPathways            | Adipogenesis                                                                 | 8     | 50.00 | -14.68   |
| GO:0001101 | GO Biological Processes | response to acid chemical                                                    | 7     | 43.75 | -9.59    |
| GO:0010876 | GO Biological Processes | lipid localization                                                           | 7     | 43.75 | -8.75    |
| GO:0043627 | GO Biological Processes | response to estrogen                                                         | 4     | 25.00 | -7.18    |
| GO:0022407 | GO Biological Processes | regulation of cell-cell adhesion                                             | 6     | 37.50 | -7.01    |
| GO:2000696 | GO Biological Processes | regulation of epithelial cell differentiation involved in kidney development | 3     | 18.75 | -6.84    |
| GO:0055088 | GO Biological Processes | lipid homeostasis                                                            | 4     | 25.00 | -5.74    |
| WP4321     | WikiPathways            | Thermogenesis                                                                | 3     | 18.75 | -4.53    |
| GO:0048863 | GO Biological Processes | stem cell differentiation                                                    | 3     | 18.75 | -3.41    |

**Table S4.** Enrichment analysis of module genes detected from GSE42568 using Metascape web

| GO           | Category                | Description                                                              | Count | %     | Log10(P) |
|--------------|-------------------------|--------------------------------------------------------------------------|-------|-------|----------|
| R-HSA-198933 | Reactome Gene Sets      | Immunoregulatory interactions between a Lymphoid and a non-Lymphoid cell | 7     | 24.14 | -10.21   |
| GO:0046649   | GO Biological Processes | lymphocyte activation                                                    | 11    | 37.93 | -9.97    |
| WP4884       | WikiPathways            | Pathogenesis of SARS-CoV-2 Mediated by nsp9-nsp10 Complex                | 4     | 13.79 | -8.18    |
| GO:0001817   | GO Biological Processes | regulation of cytokine production                                        | 7     | 24.14 | -4.90    |
| GO:0032615   | GO Biological Processes | interleukin-12 production                                                | 3     | 10.34 | -4.49    |
| GO:0030101   | GO Biological Processes | natural killer cell activation                                           | 3     | 10.34 | -4.04    |
| GO:0009615   | GO Biological Processes | response to virus                                                        | 4     | 13.79 | -3.32    |
| GO:0038061   | GO Biological Processes | NIK/NF-kappaB signaling                                                  | 3     | 10.34 | -3.02    |

**Table S5.** Validation of module genes applying UALCAN web based on TCGA and survival analysis using bc-GenExMiner resource

| Datasets      | Genes          | BC vs. N            |                 | OS              |                 | DMFS            |                 | DFS             |            |
|---------------|----------------|---------------------|-----------------|-----------------|-----------------|-----------------|-----------------|-----------------|------------|
|               |                | Log <sub>2</sub> FC | Direction       | HR (95%CI)      | P value         | HR (95%CI)      | P value         | HR (95%CI)      | P value    |
| GSE9574       | <i>JUN</i>     | -1.16***            | Down***         | 0.89(0.82-0.97) | 0.0082**        | 0.92(0.83-1.01) | 0.0689          | 0.91(0.85-0.97) | 0.0059**   |
|               | <i>FOS</i>     | -2.43***            | Down***         | 0.77(0.71-0.84) | <0.0001***      | 0.75(0.68-0.82) | <0.0001***      | 0.79(0.74-0.84) | <0.0001*** |
|               | <i>FOSB</i>    | -2.80***            | Down***         | 0.81(0.74-0.88) | <0.0001***      | 0.79(0.72-0.87) | <0.0001***      | 0.84(0.78-0.90) | <0.0001*** |
|               | <i>EGR1</i>    | -1.31***            | Down***         | 0.85(0.78-0.93) | 0.0002***       | 0.82(0.75-0.90) | <0.0001***      | 0.85(0.79-0.91) | <0.0001*** |
|               | <i>IER2</i>    | -1.48***            | Down***         | 0.92(0.84-1.00) | 0.0570          | -               | -               | -               | -          |
|               | <i>NR4A2</i>   | -1.87***            | Down***         | 1.00(0.91-1.09) | 0.9210          | -               | -               | -               | -          |
|               | <i>ZFP36</i>   | -1.52***            | Down***         | 0.86(0.79-0.93) | 0.0004***       | 0.84(0.76-0.92) | 0.0002***       | 0.88(0.82-0.94) | <0.0001*** |
|               | <i>ATF3</i>    | -2.31***            | Down***         | 0.92(0.84-1.00) | 0.0554          | -               | -               | -               | -          |
| GSE15258      | <i>ACSL1</i>   | -1.42***            | Down***         | 1.10(1.01-1.20) | 0.0244*         | 1.05(0.96-1.15) | 0.2856          | 1.09(1.02-1.16) | 0.0135*    |
|               | <i>PCK1</i>    | -3.24***            | Down***         | 0.93(0.85-1.02) | 0.1138          | -               | -               | -               | -          |
|               | <i>CIDECA</i>  | -1.14***            | Down***         | 0.91(0.83-1.00) | 0.0570          | -               | -               | -               | -          |
|               | <i>RBP4</i>    | -1.14***            | Down***         | 0.94(0.86-1.02) | 0.1611          | -               | -               | -               | -          |
|               | <i>CFD</i>     | -1.57***            | Down***         | 0.86(0.79-0.94) | 0.0006***       | 0.76(0.69-0.83) | <0.0001***      | 0.86(0.81-0.92) | <0.0001*** |
|               | <i>LEP</i>     | -1.08***            | Down***         | 0.85(0.78-0.93) | 0.0005***       | 0.94(0.85-1.03) | 0.1647          | 0.90(0.85-0.97) | 0.0037**   |
|               | <i>LPL</i>     | -1.75***            | Down***         | 0.88(0.8-0.96)  | 0.0045**        | 0.93(0.85-1.02) | 0.1222          | 0.94(0.88-1.01) | 0.0724     |
|               | <i>FABP4</i>   | -1.96***            | Down***         | 0.85(0.78-0.93) | 0.0003***       | 0.88(0.81-0.97) | 0.0093**        | 0.91(0.85-0.98) | 0.0071**   |
|               | <i>PLIN1</i>   | -1.79***            | Down***         | 0.87(0.79-0.95) | 0.0022**        | 0.81(0.74-0.89) | <0.0001***      | 0.87(0.81-0.93) | <0.0001*** |
|               | <i>ADIPOQ</i>  | -2.25***            | Down***         | 0.85(0.74-0.98) | 0.0235*         | 0.88(0.79-0.99) | 0.0351*         | 0.92(0.85-1.00) | 0.0520     |
|               | <i>PPARG</i>   | -1.01***            | Down***         | 0.83(0.76-0.90) | <0.0001***      | 0.86(0.78-0.95) | 0.0018**        | 0.87(0.81-0.93) | <0.0001*** |
|               | <i>CD24</i>    | 1.43***             | Up***           | 1.21(1.10-1.32) | <0.0001***      | 1.22(1.11-1.34) | <0.0001***      | 1.13(1.06-1.21) | 0.0005***  |
|               | <i>KRT18</i>   | 1.08***             | Up***           | 1.19(1.08-1.30) | 0.0002***       | 1.03(0.94-1.14) | 0.4869          | 1.11(1.03-1.19) | 0.0032**   |
|               | <i>KRT19</i>   | 1.87***             | Up***           | 1.10(1.01-1.20) | 0.0287*         | 0.96(0.87-1.05) | 0.3758          | 1.04(0.97-1.11) | 0.2477     |
|               | <i>EPCAM</i>   | 1.20***             | Up***           | 1.16(1.07-1.27) | 0.0005***       | 1.25(1.14-1.37) | <0.0001***      | 1.17(1.10-1.25) | <0.0001*** |
| <i>GATA3</i>  | 1.07***        | Up***               | 0.85(0.78-0.92) | 0.0001***       | 0.76(0.69-0.83) | <0.0001***      | 0.86(0.81-0.92) | <0.0001***      |            |
| GSE42568      | <i>PVRIG</i>   | 1.17***             | Up***           | 0.89(0.81-0.97) | 0.0080**        | 0.92(0.83-1.01) | 0.0900          | 0.88(0.82-0.94) | 0.0001***  |
|               | <i>CD27</i>    | 1.95***             | Up***           | 0.89(0.81-0.97) | 0.0089**        | 0.90(0.82-0.99) | 0.0253*         | 0.86(0.81-0.92) | <0.0001*** |
|               | <i>IL21R</i>   | 1.18***             | Up***           | 1.01(0.92-1.10) | 0.8824          | -               | -               | -               | -          |
|               | <i>TIGIT</i>   | 1.19***             | Up***           | 0.99(0.89-1.09) | 0.7712          | -               | -               | -               | -          |
|               | <i>MAP4K1</i>  | 1.56***             | Up***           | 0.98(0.90-1.06) | 0.5672          | -               | -               | -               | -          |
|               | <i>PTPRCAP</i> | 1.29***             | Up***           | 1.00(0.91-1.10) | 0.9986          | -               | -               | -               | -          |
|               | <i>CCR7</i>    | 2.12***             | Up***           | 0.93(0.85-1.01) | 0.1030          | -               | -               | -               | -          |
|               | <i>HLA-F</i>   | 1.37***             | Up***           | 1.06(0.97-1.15) | 0.2082          | -               | -               | -               | -          |
|               | <i>HLA-J</i>   | 1.21***             | Down***         | -               | -               | -               | -               | -               | -          |
|               | <i>HLA-C</i>   | 1.01***             | Up***           | 1.06(0.97-1.16) | 0.2055          | -               | -               | -               | -          |
|               | <i>HLA-B</i>   | 1.06***             | Up***           | 1.06(0.97-1.16) | 0.2080          | -               | -               | -               | -          |
|               | <i>PSMB9</i>   | 1.20***             | Up***           | 1.11(1.02-1.22) | 0.0185*         | 1.07(0.97-1.18) | 0.1707          | 1.04(0.97-1.11) | 0.3196     |
|               | <i>GPD1</i>    | -2.85***            | Down***         | 0.86(0.79-0.94) | 0.0007***       | 0.83(0.76-0.92) | 0.0002***       | 0.86(0.81-0.92) | <0.0001*** |
|               | <i>RBP4</i>    | -4.30***            | Down***         | 0.94(0.86-1.02) | 0.1611          | -               | -               | -               | -          |
|               | <i>CIDECA</i>  | -5.35***            | Down***         | 0.91(0.83-1.00) | 0.0570          | -               | -               | -               | -          |
|               | <i>PLIN4</i>   | -5.31***            | Down***         | 0.85(0.77-0.93) | 0.0005***       | 0.79(0.70-0.90) | 0.0002***       | 0.88(0.82-0.95) | 0.0017**   |
|               | <i>PLIN1</i>   | -5.97***            | Down***         | 0.87(0.79-0.95) | 0.0022**        | 0.81(0.74-0.89) | <0.0001***      | 0.87(0.81-0.93) | <0.0001*** |
|               | <i>CMPK2</i>   | 2.44***             | Up***           | 1.17(1.07-1.28) | 0.0007***       | 1.12(1.00-1.26) | 0.0469*         | 1.13(1.05-1.22) | 0.0013**   |
|               | <i>RSAD2</i>   | 1.78***             | Up***           | 1.19(1.09-1.31) | 0.0002***       | 1.24(1.13-1.37) | <0.0001***      | 1.15(1.07-1.24) | <0.0001*** |
|               | <i>MX1</i>     | 1.98***             | Up***           | 1.27(1.17-1.39) | <0.0001***      | 1.26(1.14-1.38) | <0.0001***      | 1.18(1.11-1.26) | <0.0001*** |
| <i>IFI44</i>  | 1.64***        | Up***               | 1.11(1.02-1.21) | 0.0166*         | 1.14(1.03-1.25) | 0.0080**        | 1.09(1.02-1.16) | 0.0125*         |            |
| <i>IFI44L</i> | 1.19*          | Up***               | 1.16(1.07-1.27) | 0.0007***       | 1.20(1.09-1.32) | 0.0002***       | 1.10(1.03-1.18) | 0.0035**        |            |

|              |         |         |                 |         |                 |        |                 |          |
|--------------|---------|---------|-----------------|---------|-----------------|--------|-----------------|----------|
| <i>CD2</i>   | 1.56*** | Up***   | 0.94(0.86-1.02) | 0.1551  | -               | -      |                 |          |
| <i>SELL</i>  | 1.34**  | Up***   | 0.91(0.84-0.99) | 0.0322* | 0.93(0.84-1.02) | 0.1141 | 0.90(0.84-0.96) | 0.0021** |
| <i>NLRC3</i> | 1.38*** | Down**  | -               | -       | -               | -      |                 |          |
| <i>CD247</i> | 1.32*** | Down**  | -               | -       | -               | -      |                 |          |
| <i>CD3G</i>  | 1.52*** | Down**  | -               | -       | -               | -      |                 |          |
| <i>EOMES</i> | 1.59*** | Up***   | 0.94(0.86-1.03) | 0.1905  | -               | -      |                 |          |
| <i>CD8A</i>  | 1.34*** | Down*** | -               | -       | -               | -      |                 |          |

\*\*\*p < 0.0001, \*\*p < 0.01, \*p < 0.05. HR, hazard ratio; CI, confidence interval. The genes highlighted in red were failed with validation. The genes highlighted in blue were the overlapping genes.

**Table S6.** The information and sample size of TCGA BC datasets

| Characteristics   | Living(N=683)      | Deceased(N=106)    | Total(N=788)       | p-value  |
|-------------------|--------------------|--------------------|--------------------|----------|
| Stage             |                    |                    |                    | 2.00E-08 |
| I                 | 123(15.71%)        | 15(1.92%)          | 138(17.62%)        |          |
| II                | 418(53.38%)        | 46(5.87%)          | 464(59.26%)        |          |
| III               | 139(17.75%)        | 34(4.34%)          | 173(22.09%)        |          |
| IV                | 2(0.26%)           | 6(0.77%)           | 8(1.02%)           |          |
| Age               |                    |                    |                    |          |
| Mean ± SD         | 57.07±12.68        | 60.97±14.75        | 57.59±13.04        |          |
| Median [min, max] | 56.00[27.00,90.00] | 61.00[26.00,90.00] | 57.00[26.00,90.00] |          |
| ER                |                    |                    |                    | 0.48     |
| Negative          | 151(20.30%)        | 27(3.63%)          | 178(23.92%)        |          |
| Positive          | 494(66.40%)        | 72(9.68%)          | 566(76.08%)        |          |
| HER2              |                    |                    |                    | 0.78     |
| Negative          | 537(71.60%)        | 79(10.53%)         | 616(82.13%)        |          |
| Positive          | 115(15.33%)        | 19(2.53%)          | 134(17.87%)        |          |
| PR                |                    |                    |                    | 0.82     |
| Negative          | 210(28.26%)        | 34(4.58%)          | 244(32.84%)        |          |
| Positive          | 434(58.41%)        | 65(8.75%)          | 499(67.16%)        |          |
| Subtypes          |                    |                    |                    | 0.53     |
| Normal-like       | 14(2.34%)          | 5(0.83%)           | 19(3.17%)          |          |
| Luminal A         | 261(43.57%)        | 42(7.01%)          | 303(50.58%)        |          |
| Luminal B         | 105(17.53%)        | 22(3.67%)          | 127(21.20%)        |          |
| HER2+             | 35(5.84%)          | 8(1.34%)           | 43(7.18%)          |          |
| Basal-like        | 92(15.36%)         | 15(2.50%)          | 107(17.86%)        |          |
| Tumor             |                    |                    |                    | 4.70E-06 |
| T1                | 185(23.51%)        | 27(3.43%)          | 212(26.94%)        |          |
| T2                | 410(52.10%)        | 53(6.73%)          | 463(58.83%)        |          |
| T3                | 76(9.66%)          | 14(1.78%)          | 90(11.44%)         |          |
| T4                | 11(1.40%)          | 11(1.40%)          | 22(2.80%)          |          |
| Node              |                    |                    |                    | 0.01     |
| N0                | 346(44.13%)        | 36(4.59%)          | 382(48.72%)        |          |
| N1                | 221(28.19%)        | 45(5.74%)          | 266(33.93%)        |          |
| N2                | 73(9.31%)          | 18(2.30%)          | 91(11.61%)         |          |
| N3                | 39(4.97%)          | 6(0.77%)           | 45(5.74%)          |          |
| Metastasis        |                    |                    |                    | 3.20E-08 |
| Negative          | 593(85.45%)        | 91(13.11%)         | 684(98.56%)        |          |
| Positive          | 2(0.29%)           | 8(1.15%)           | 10(1.44%)          |          |

|             |             |           |             |      |
|-------------|-------------|-----------|-------------|------|
| TP53        |             |           |             | 0.37 |
| Non-mutated | 459(58.17%) | 66(8.37%) | 525(66.54%) |      |
| Mutated     | 224(28.39%) | 40(5.07%) | 264(33.46%) |      |

**Table S7.** Univariate OS analysis using Cox Proportional Hazards model carried out by R with TCGA BC datasets

| Variables    | Univariate analysis |            | Variables     | Univariate analysis |            |
|--------------|---------------------|------------|---------------|---------------------|------------|
|              | HR (95%CI)          | P-value    |               | HR (95%CI)          | P-value    |
| Stage        | 2.2 (1.6-2.9)       | 2.3e-07*** | <i>PLIN1</i>  | 0.93 (0.86-0.99)    | 0.033*     |
| Age          | 1 (1-1.1)           | 3.3e-06*** | <i>ADIPOQ</i> | 0.94 (0.9-0.99)     | 0.025*     |
| ER           | 0.88 (0.56-1.4)     | 0.59       | <i>PPARG</i>  | 0.8 (0.69-0.94)     | 0.0054**   |
| HER2         | 1.3 (0.8-2.2)       | 0.27       | <i>CD24</i>   | 1.2 (1.1-1.3)       | 0.0042**   |
| PR           | 1 (0.66-1.5)        | 0.98       | <i>KRT18</i>  | 0.99 (0.84-1.2)     | 0.92       |
| Subtypes     | 0.97 (0.82-1.1)     | 0.73       | <i>KRT19</i>  | 0.91 (0.8-1)        | 0.13       |
| Tumor        | 1.5 (1.2-1.9)       | 8e-04***   | <i>EPCAM</i>  | 1.1 (0.91-1.4)      | 0.26       |
| Node         | 1.5 (1.2-1.9)       | 0.00015*** | <i>GATA3</i>  | 0.98 (0.9-1.1)      | 0.7        |
| Metastasis   | 4 (1.8-8.5)         | 0.00045*** | <i>PVRIG</i>  | 0.74 (0.64-0.87)    | 0.00019*** |
| <i>TP53</i>  | 1.1 (0.76-1.7)      | 0.55       | <i>CD27</i>   | 0.79 (0.71-0.88)    | 1.5e-05*** |
| <i>JUN</i>   | 0.77 (0.64-0.93)    | 0.0062**   | <i>PSMB9</i>  | 0.83 (0.71-0.96)    | 0.014*     |
| <i>FOS</i>   | 0.9 (0.81-1)        | 0.047*     | <i>GPD1</i>   | 0.9 (0.83-0.96)     | 0.0032**   |
| <i>FOSB</i>  | 0.91 (0.83-0.99)    | 0.037*     | <i>PLIN4</i>  | 0.9 (0.84-0.97)     | 0.0063**   |
| <i>EGR1</i>  | 0.89 (0.79-1)       | 0.068      | <i>CMPK2</i>  | 1 (0.89-1.2)        | 0.79       |
| <i>ZFP36</i> | 0.83 (0.7-0.97)     | 0.023*     | <i>RSAD2</i>  | 1 (0.9-1.1)         | 0.84       |
| <i>ACSL1</i> | 1.1 (0.95-1.3)      | 0.17       | <i>MX1</i>    | 1 (0.89-1.1)        | 0.99       |
| <i>CFD</i>   | 0.89 (0.8-0.98)     | 0.02*      | <i>IFI44</i>  | 0.96 (0.84-1.1)     | 0.58       |
| <i>LEP</i>   | 0.92 (0.85-0.99)    | 0.018*     | <i>IFI44L</i> | 0.98 (0.87-1.1)     | 0.68       |
| <i>LPL</i>   | 0.92 (0.82-1)       | 0.15       | <i>SELL</i>   | 0.81 (0.72-0.91)    | 0.00045*** |
| <i>FABP4</i> | 0.94 (0.89-1)       | 0.054      |               |                     |            |

\*p<0.05, \*\*p<0.01, \*\*\*p<0.001. HR, hazard ratio; CI, confidence interval.



**Table S8.** Multivariate OS analysis using Cox Proportional Hazards model carried out by R with TCGA BC datasets

| Multivariate analysis for <i>CFD</i> |                  |             | Multivariate analysis for <i>PPARG</i> |                   |             | Multivariate analysis for <i>CD27</i> |                  |             |
|--------------------------------------|------------------|-------------|----------------------------------------|-------------------|-------------|---------------------------------------|------------------|-------------|
| Variables                            | HR (95%CI)       | P-value     | Variables                              | HR (95%CI)        | P-value     | Variables                             | HR (95%CI)       | P-value     |
| Stage                                | 1.99 (0.90-4.41) | 0.0902      | Stage                                  | 2.05 (0.92-4.57)  | 0.0804      | Stage                                 | 2.24 (1.02-4.93) | 0.0454*     |
| Age                                  | 1.05 (1.03-1.07) | 2.99e-07*** | Age                                    | 1.05 (1.03-1.07)  | 8.07e-07*** | Age                                   | 1.05 (1.03-1.07) | 5.94e-07*** |
| ER                                   | 0.94 (0.40-2.25) | 0.8937      | ER                                     | 0.96 (0.40-2.33)  | 0.9334      | ER                                    | 0.75 (0.32-1.74) | 0.4979      |
| HER2                                 | 1.53 (0.83-2.80) | 0.1711      | HER2                                   | 1.61 (0.88-2.96)  | 0.1243      | HER2                                  | 1.69 (0.91-3.13) | 0.0956      |
| PR                                   | 0.86 (0.38-1.93) | 0.7092      | PR                                     | 0.82 (0.37-1.83)  | 0.6263      | PR                                    | 0.78 (0.35-1.75) | 0.5538      |
| Subtypes                             | 0.80 (0.58-1.11) | 0.1819      | Subtypes                               | 0.82 (0.60-1.13)  | 0.2323      | Subtypes                              | 0.84 (0.61-1.15) | 0.2686      |
| Tumor                                | 0.86 (0.54-1.34) | 0.4971      | Tumor                                  | 0.86 (0.55-1.36)  | 0.5272      | Tumor                                 | 0.77 (0.49-1.19) | 0.2355      |
| Node                                 | 1.11 (0.90-1.77) | 0.6715      | Node                                   | 1.09 (0.68-1.74)  | 0.7354      | Node                                  | 1.13 (0.71-1.80) | 0.5996      |
| Metastasis                           | 1.66 (0.50-5.47) | 0.4086      | Metastasis                             | 1.41 (0.42-4.77)  | 0.5801      | Metastasis                            | 1.64 (0.50-5.33) | 0.4143      |
| <i>TP53</i>                          | 1.18 (0.62-2.25) | 0.6205      | <i>TP53</i>                            | 1.29 (0.68-2.47)  | 0.4341      | <i>TP53</i>                           | 1.44 (0.74-2.81) | 0.2811      |
| <i>CFD</i>                           | 0.84 (0.72-0.99) | 0.0327*     | <i>PPARG</i>                           | 0.80 (0.65-0.998) | 0.0478*     | <i>CD27</i>                           | 0.75 (0.66-0.87) | 0.0001***   |

  

| Multivariate analysis for <i>PSMB9</i> |                  |             | Multivariate analysis for <i>SELL</i> |                  |            |
|----------------------------------------|------------------|-------------|---------------------------------------|------------------|------------|
| Variables                              | HR (95%CI)       | P-value     | Variables                             | HR (95%CI)       | P-value    |
| Stage                                  | 2.02 (0.93-4.40) | 0.07579     | Stage                                 | 2.22 (0.99-4.95) | 2.3e-07*** |
| Age                                    | 1.05 (1.03-1.07) | 1.93e-07*** | Age                                   | 1.05 (1.03-1.07) | 3.3e-06*** |
| ER                                     | 0.83 (0.36-1.95) | 0.67639     | ER                                    | 0.72 (0.30-1.71) | 0.59       |
| HER2                                   | 1.63 (0.88-3.03) | 0.11948     | HER2                                  | 1.80 (0.97-3.32) | 0.27       |
| PR                                     | 0.95 (0.42-2.18) | 0.90841     | PR                                    | 0.75 (0.33-1.70) | 0.98       |
| Subtypes                               | 0.94 (0.68-1.30) | 0.70748     | Subtypes                              | 0.78 (0.56-1.08) | 0.73       |
| Tumor                                  | 0.91 (0.59-1.41) | 0.67753     | Tumor                                 | 0.87 (0.55-1.37) | 8e-04***   |
| Node                                   | 1.07 (0.68-1.68) | 0.78444     | Node                                  | 1.07 (0.68-1.70) | 0.00015*** |
| Metastasis                             | 1.87 (0.57-6.10) | 0.29838     | Metastasis                            | 1.21 (0.36-4.08) | 0.00045*** |
| <i>TP53</i>                            | 1.37 (0.70-2.69) | 0.36242     | <i>TP53</i>                           | 1.48 (0.76-2.90) | 0.55       |
| <i>PSMB9</i>                           | 0.73 (0.60-0.90) | 0.00299**   | <i>SELL</i>                           | 0.77(0.66-0.90)  | 0.0062**   |

\*p<0.05, \*\*p<0.01, \*\*\*p<0.001. HR, hazard ratio; CI, confidence interval.

**Table S9.** GSEA according to the expression level of *FOS* and gene sets of KEGG pathway.

| Datasets                    | KEGG pathways                                              | SIZE  | NES   | FDR<br>q-value |
|-----------------------------|------------------------------------------------------------|-------|-------|----------------|
| GSE9574                     | Positively correlated pathways                             |       |       |                |
|                             | 1. LEISHMANIA_INFECTION                                    | 67    | 1.80  | 0.125          |
|                             | 2. FC_GAMMA_R_MEDIATED_PHAGOCYTOSIS                        | 87    | 1.71  | 0.215          |
|                             | 3. GRAFT_VERSUS_HOST_DISEASE                               | 35    | 1.67  | 0.223          |
|                             | 4. ADIPOCYTOKINE_SIGNALING_PATHWAY                         | 62    | 1.66  | 0.174          |
|                             | 5. ALLOGRAFT_REJECTION                                     | 33    | 1.64  | 0.182          |
|                             | 6. TYPE_I_DIABETES_MELLITUS                                | 39    | 1.63  | 0.167          |
|                             | 7. VIBRIO_CHOLERAЕ_INFECTION                               | 46    | 1.61  | 0.168          |
|                             | 8. ANTIGEN_PROCESSING_AND_PRESENTATION                     | 73    | 1.56  | 0.239          |
|                             | 9. GLYCOPHINGOLIPID_BIOSYNTHESIS_LACTO_AND_NEOLACTO_SERIES | 23    | 1.56  | 0.214          |
|                             | Negatively correlated pathways                             |       |       |                |
| 1. LINOLEIC_ACID_METABOLISM | 22                                                         | -1.73 | 0.140 |                |
| GSE15852                    | Positively correlated pathways                             |       |       |                |
|                             | 1. FOCAL_ADHESION                                          | 187   | 1.64  | 0.198          |
|                             | 2. RETINOL_METABOLISM                                      | 38    | 1.64  | 0.232          |
| GSE42568                    | Positively correlated pathways                             |       |       |                |
|                             | 1. FOCAL_ADHESION                                          | 194   | 1.93  | 0.023          |
|                             | 2. ADHERENS_JUNCTION                                       | 66    | 1.83  | 0.074          |
|                             | 3. COLORECTAL_CANCER                                       | 61    | 1.83  | 0.049          |
|                             | 4. ECM_RECEPTOR_INTERACTION                                | 81    | 1.80  | 0.061          |
|                             | 5. TGF_BETA_SIGNALING_PATHWAY                              | 80    | 1.75  | 0.101          |
|                             | 6. COMPLEMENT_AND_COAGULATION_CASCADES                     | 67    | 1.70  | 0.154          |
|                             | 7. PATHWAYS_IN_CANCER                                      | 317   | 1.68  | 0.165          |
|                             | 8. WNT_SIGNALING_PATHWAY                                   | 146   | 1.65  | 0.200          |
|                             | 9. VALINE_LEUCINE_AND_ISOLEUCINE_DEGRADATION               | 43    | 1.65  | 0.181          |
|                             | 10. LYSOSOME                                               | 116   | 1.64  | 0.180          |
|                             | 11. FATTY_ACID_METABOLISM                                  | 40    | 1.64  | 0.167          |
|                             | 12. ACUTE_MYELOID_LEUKEMIA                                 | 56    | 1.60  | 0.211          |
|                             | 13. ENDOCYTOSIS                                            | 170   | 1.58  | 0.230          |
| 14. AXON_GUIDANCE           | 128                                                        | 1.57  | 0.236 |                |
